# Supplementary material for: Mechanistic insights into the co-recovery of nickel and iron via integrated carbon mineralization of serpentinized peridotite by harnessing organic ligands
Source: Royal Society of Chemistry journal article supplement (doi:10.1039/d3cp04996e), 2024-01-01
Supplement: d3cp04996e1.pdf [file d3cp04996e1.pdf]

# SUPPLEMENTARY INFORMATION

## for

### *Mechanistic Insights into the Co-Recovery of Nickel and Iron via Integrated Carbon Mineralization of Serpentinized Peridotite by Harnessing Organic Ligands*

*Shreya Katre,<sup>ab</sup> Prince Ochonma,<sup>c</sup> Hassnain Asgar,<sup>a</sup> Archana M Nair,<sup>b</sup> Ravi K<sup>b</sup>  
and Greeshma Gadikota<sup>\*ac</sup>*

*<sup>a</sup>School of Civil and Environmental Engineering, Cornell University, Ithaca, NY  
14853 USA*

*<sup>b</sup>Department of Civil Engineering, Indian Institute of Technology, Guwahati,  
Assam 781039 India*

*<sup>c</sup>Smith School of Chemical and Biomolecular Engineering, Cornell University,  
Ithaca, NY 14853 USA*

\* Corresponding Author. Phone: +1 607-255-4796. E-mail: [gg464@cornell.edu](mailto:gg464@cornell.edu)

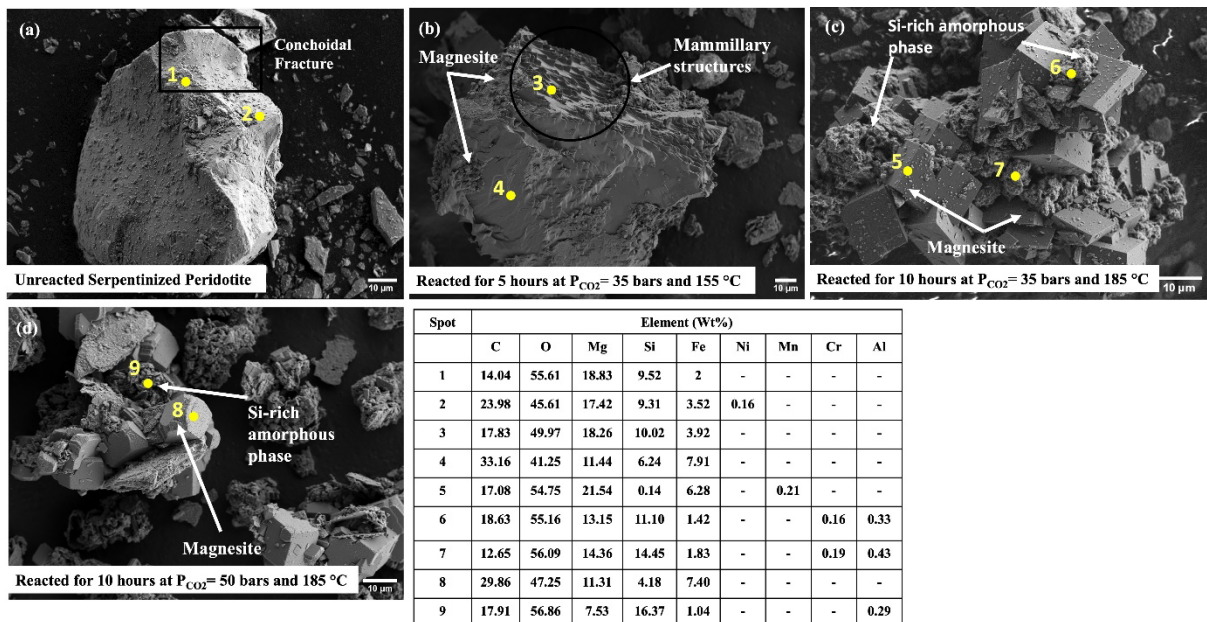

**Figure S1.** SEM-EDS analysis of carbonate-bearing solids for a) unreacted serpentinized peridotite (Spots 1 and 2) and carbonated solids b) reacted for 5 hours at  $P_{CO_2} = 35$  bars and 155 °C (Spots 3 and 4) c) reacted for 10 hours at  $P_{CO_2} = 35$  bars and 185 °C (Spots 5,6 and 7) d) reacted for 10 hours at  $P_{CO_2} = 50$  bars and 185 °C (Spots 8 and 9) using 0.1 M  $Na_2EDTA$  chelating agent + 2 M  $NaHCO_3$ , slurry density of 15 wt% and a stirring speed of 500 rpm

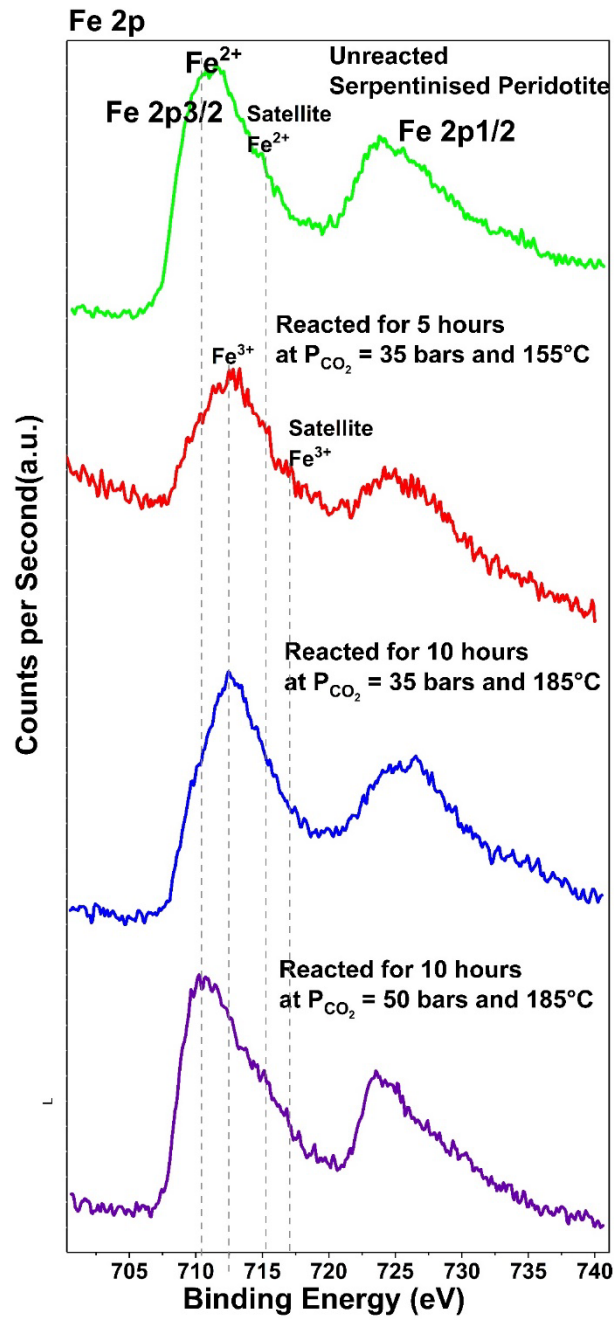

**Figure S2.** XPS Fe 2p spectra of unreacted and carbonate-bearing samples at various experimental conditions using 0.1 M  $\text{Na}_2\text{EDTA}$  chelating agent + 2 M  $\text{NaHCO}_3$

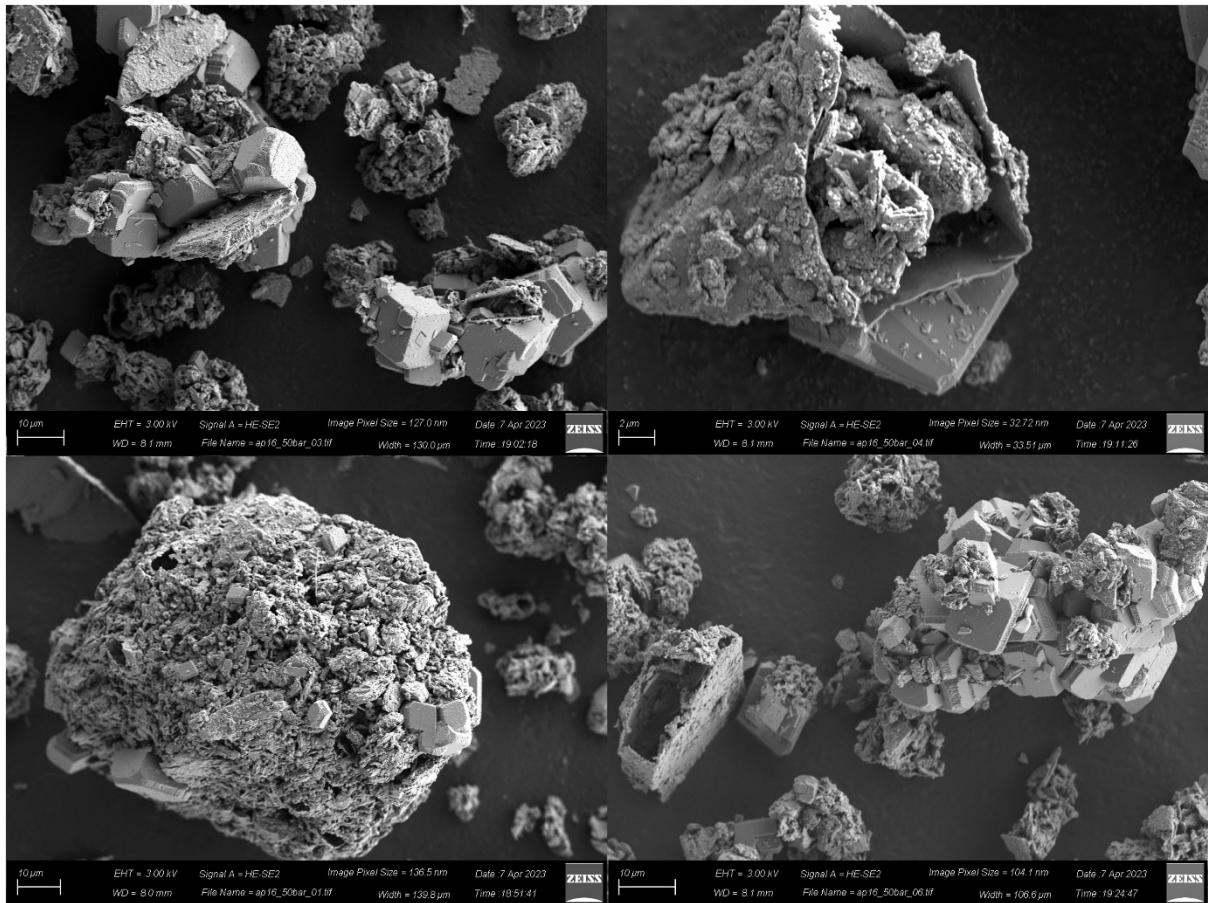

**Figure S3.** Characterization of morphological changes in carbonate-bearing solids using SEM showing weathered and broken crystals of magnesite reacted for 10 hours at  $P_{CO_2} = 50$  bars and  $185\text{ }^\circ\text{C}$  using  $0.1\text{ M Na}_2\text{EDTA}$  chelating agent +  $2\text{ M NaHCO}_3$ , slurry density of 15 wt% and a stirring speed of 500 rpm. These reactions conditions correspond to Case III.

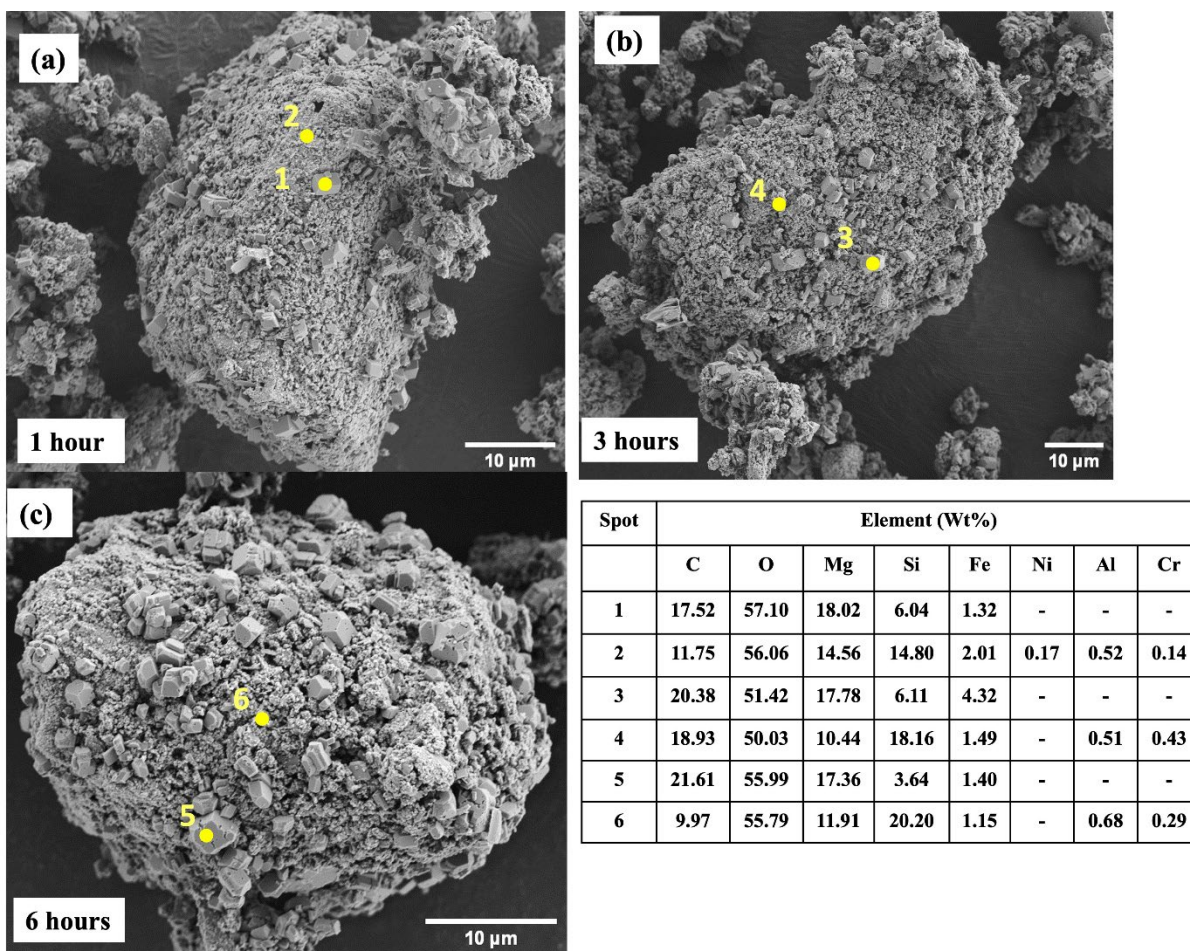

**Figure S4.** SEM-EDS characterization of the morphological changes in carbonate-bearing solids using SEM showing the amorphous silica-rich coating over solids reacted for (a) 1 hour (b) 3 hours and (c) 6 hours at  $P_{CO_2} = 50$  bars and  $185\text{ }^\circ\text{C}$  using  $0.1\text{ M Na}_2\text{EDTA}$  chelating agent +  $2\text{ M NaHCO}_3$ , slurry density of  $15\text{ wt}\%$  and a stirring speed of  $500\text{ rpm}$ .

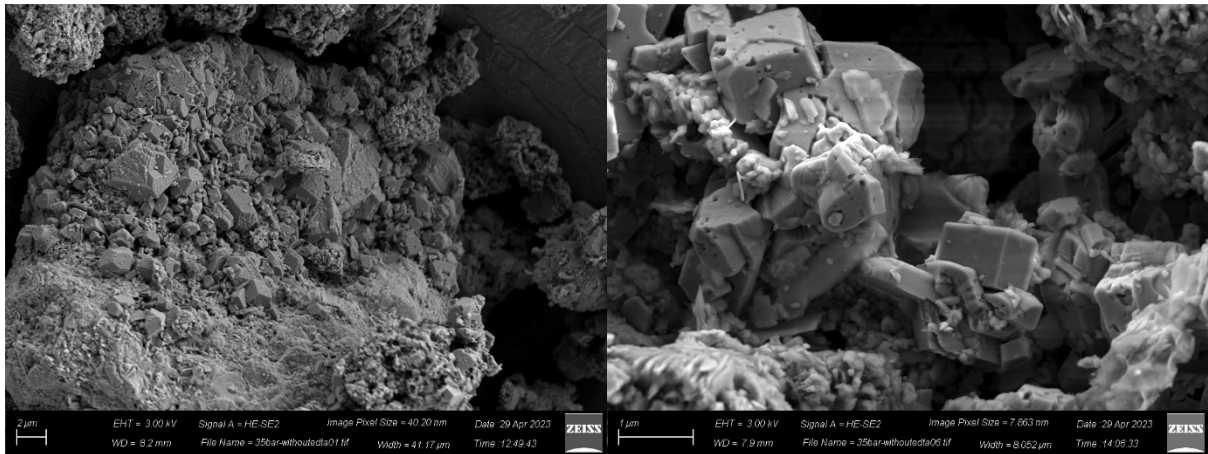

**Figure S5.** Characterization of morphological changes in carbonate-bearing solids using SEM showing the weathered quality of magnesite crystals after reacting for 18 hours at  $P_{CO_2} = 35$  bars and  $185\text{ }^{\circ}\text{C}$  using  $0.1\text{ M Na}_2\text{EDTA}$  chelating agent +  $2\text{ M NaHCO}_3$ , slurry density of 15 wt% and a stirring speed of 500 rpm.

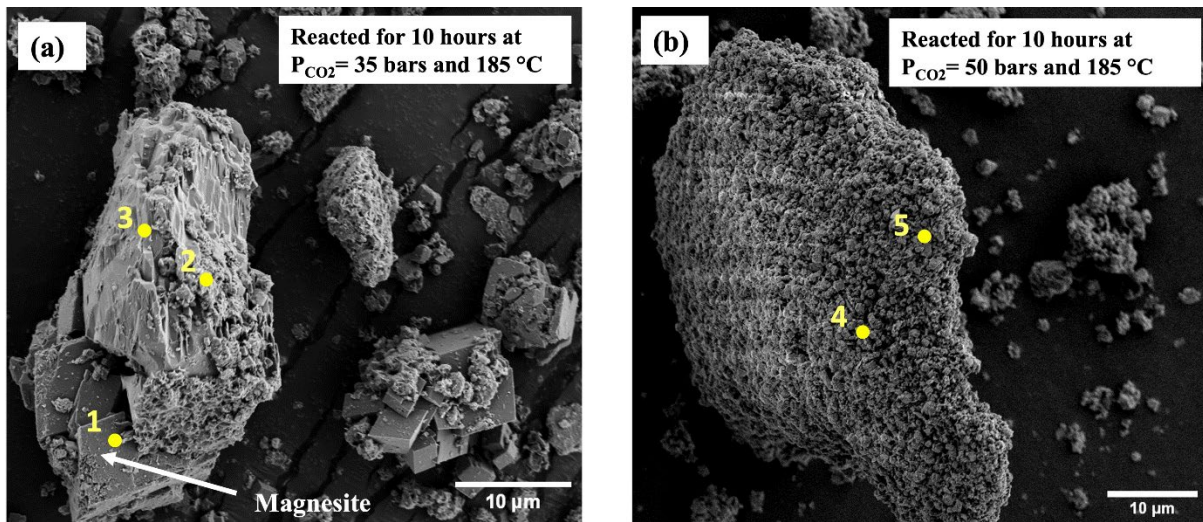

| Spot | Element (Wt%) |       |       |       |      |      |      |
|------|---------------|-------|-------|-------|------|------|------|
|      | C             | O     | Mg    | Si    | Fe   | Ni   | Al   |
| 1    | 19.25         | 57.25 | 19.73 | 0.19  | 3.58 | -    | -    |
| 2    | 22.23         | 48.98 | 15.38 | 9.75  | 3.41 | 0.25 | -    |
| 3    | 13.31         | 44.31 | 22.77 | 13.62 | 6.00 | -    | -    |
| 4    | 24.01         | 57.32 | 11.13 | 5.71  | 1.66 | -    | 0.17 |
| 5    | 27.32         | 49.64 | 8.96  | 12.08 | 1.72 | -    | 0.27 |

**Figure S6.** SEM-EDS characterization of morphological changes in carbonate-bearing solids using SEM in the absence of EDTA chelating agent showing the presence of magnesite and amorphous silica-rich phases when (a) reacted for 10 hours at  $P_{CO_2} = 35$  bars and  $185\text{ }^\circ\text{C}$  and (b) reacted for 10 hours at  $P_{CO_2} = 50$  bars and  $185\text{ }^\circ\text{C}$  in the presence of  $2\text{ M NaHCO}_3$ , slurry density of  $15\text{ wt}\%$  and a stirring speed of  $500\text{ rpm}$ .

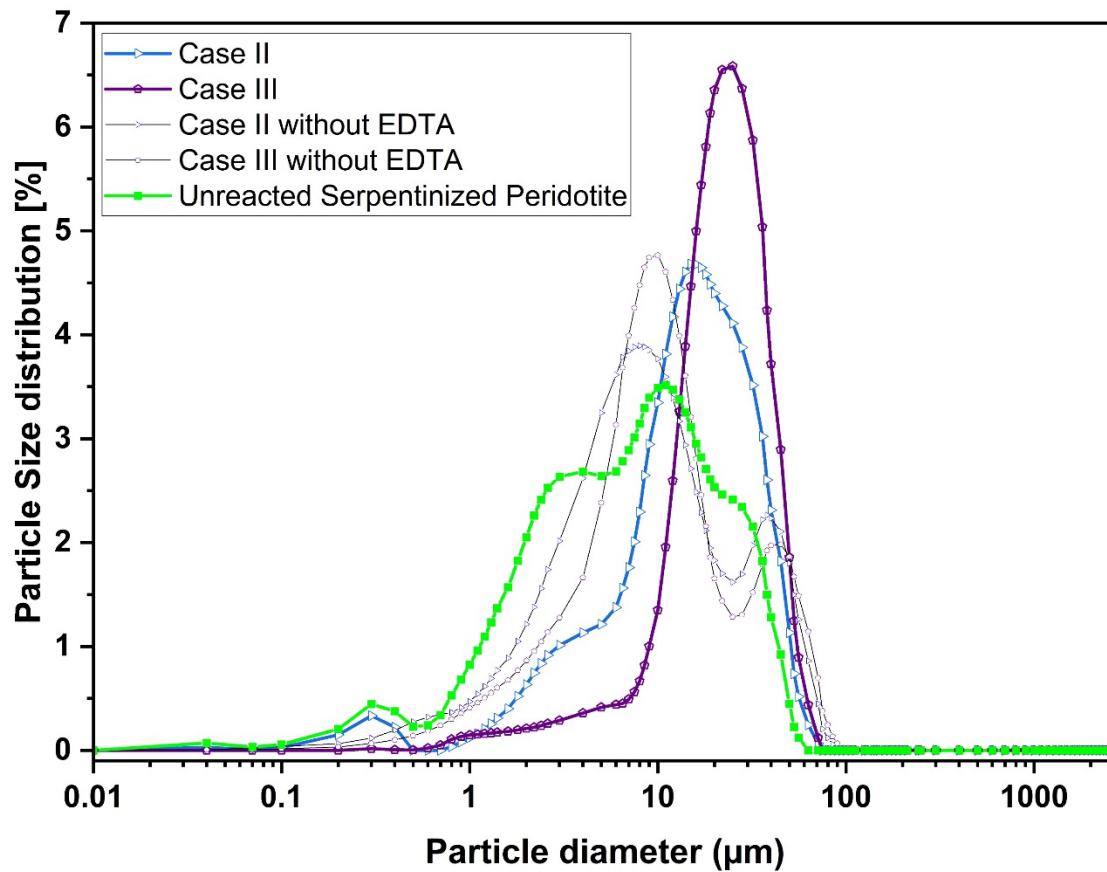

**Figure S7.** Comparison of particle size distributions between unreacted serpentinized peridotite and the carbonate-bearing solids for Case II and Case III, both with and without the presence of the organic ligand EDTA.



**Table S1.** Description of various reaction parameters for experiments conducted in this study.

| Reactions | CO <sub>2</sub> Partial Pressure (bars) | Reaction Temperature (°C) | Reaction Time (Hours) | Chemical Additives                                  |
|-----------|-----------------------------------------|---------------------------|-----------------------|-----------------------------------------------------|
| 1         | 35                                      | 155                       | 5                     | 2 M NaHCO <sub>3</sub> ; 0.1 M Na <sub>2</sub> EDTA |
| 2         |                                         | 185                       | 10                    |                                                     |
| 3         |                                         |                           | 18                    |                                                     |
| 4         | 50                                      | 185                       | 1                     |                                                     |
| 5         |                                         |                           | 3                     |                                                     |
| 6         |                                         |                           | 6                     |                                                     |
| 7         |                                         |                           | 10                    |                                                     |
| 8         | 35                                      | 185                       | 10                    | 2 M NaHCO <sub>3</sub>                              |
| 9         | 50                                      | 185                       | 10                    | 2 M NaHCO <sub>3</sub>                              |

**Table S2.** Phase quantification of unreacted and reacted samples using XRD analysis

|                              | Forsterite       | Serpentine (Antigorite) | Magnesite        | Other minor phases | Serpentine : Forsterite | Serpentine : Magnesite |
|------------------------------|------------------|-------------------------|------------------|--------------------|-------------------------|------------------------|
| Raw Serpentinized peridotite | $56.50 \pm 1.76$ | $36.85 \pm 3.85$        | 0                | $6.65 \pm 2.98$    | 0.65                    | 0.00                   |
| Case I                       | $23.10 \pm 2.81$ | $26.50 \pm 3.56$        | $45.20 \pm 4.83$ | $5.20 \pm 1.76$    | 1.15                    | 0.59                   |
| Case II                      | $11.97 \pm 3.15$ | $23.10 \pm 5.13$        | $49.76 \pm 7.44$ | $15.17 \pm 3.89$   | 1.93                    | 0.46                   |
| Case III                     | $0.95 \pm 0.32$  | $16.20 \pm 6.57$        | $62.26 \pm 8.30$ | $20.58 \pm 6.93$   | 17.05                   | 0.26                   |

**Table S3.** XPS determined binding energies (eV) for unreacted and carbonate-bearing samples

| Element             | Si     |           |           |                | C     |       |       |       |                | O     |       |       |       | Mg             |         |         | O/Si    | Mg/Si          |             |             |
|---------------------|--------|-----------|-----------|----------------|-------|-------|-------|-------|----------------|-------|-------|-------|-------|----------------|---------|---------|---------|----------------|-------------|-------------|
| Case                | 2p     | 2p<br>1/2 | 2p<br>3/2 | Atomic<br>wt % | 1s    |       |       |       | Atomic<br>wt % | 1s    |       |       |       | Atomic<br>wt % | 1s      |         |         | Atomic<br>wt % | atomic<br>% | atomic<br>% |
| Unreacted<br>Sample | 102.7  | 102.9     | 102.1     | 14.38          | 284.8 | 284.8 | 286.5 | 289   | 7.66           | 531.8 | 530.6 | 531.5 | 532.6 | 55.24          | 1303.76 | 1303.8  | 1304.28 | 22.4           | 3.84        | 1.56        |
| Case I              | 103    | 103.8     | 102.9     | 20.95          | 285   | 284.8 | 287   | 289.6 | 5.9            | 532   | 531.5 | 532.4 | 533.3 | 55.42          | 1304    | 1304.7  | 1305.64 | 17.66          | 2.65        | 0.84        |
| Case II             | 103.54 | 103.9     | 103.2     | 24.02          | 285.5 | 284.8 | 286.4 | 289.9 | 7.57           | 532.5 | 531.2 | 532.6 | 533.7 | 57.18          | 1304.54 | 1304.38 | 1304.75 | 10.89          | 2.38        | 0.45        |
| Case III            | 103.63 | 104       | 103.1     | 25.82          | 289.6 | 284.8 | 286.6 | 289.7 | 8.72           | 532.6 | 531.4 | 532.5 | 533.5 | 59.34          | 1304.63 | 1304.12 | 1304.84 | 5.87           | 2.30        | 0.23        |

**Table S4.** Stability constant ( $\log K_{ML}$ ) of metal-EDTA complex ions in aqueous solution (Wang and Dreisinger, 2022; Martell and Smith, 1974).

| Cations                                  | Mg <sup>2+</sup> | Ca <sup>2+</sup> | Fe <sup>2+</sup> | Co <sup>2+</sup> | Ni <sup>2+</sup> | Fe <sup>3+</sup> | Cr <sup>2+</sup> | Cr <sup>3+</sup> |
|------------------------------------------|------------------|------------------|------------------|------------------|------------------|------------------|------------------|------------------|
| $\log K_{ML}$ of metal-EDTA complex ions | 8.69             | 10.69            | 14.32            | 16.31            | 18.62            | 25.1             | 13.6             | 23.4             |

**Table S5.** Thermodynamic properties of common minerals in ultramafic formations at different reaction conditions (Robie and Hemingway, 1995)

| Common Minerals<br>in Ultramafic<br>Formations | Chemical<br>Formula              | 298.15 k and 1 Bar |                                      |                 |                      |                      |                      | 458.15 k and 1 Bar   |                      |                      |
|------------------------------------------------|----------------------------------|--------------------|--------------------------------------|-----------------|----------------------|----------------------|----------------------|----------------------|----------------------|----------------------|
|                                                |                                  | Weight             | Entropy                              | Volume          | Enthalpy             | Free<br>Energy       | Log(K <sub>f</sub> ) | Enthalpy             | Free<br>Energy       | Log(K <sub>f</sub> ) |
|                                                |                                  |                    | S°                                   | V°              | Δ <sub>f</sub> H°    | Δ <sub>f</sub> G°    |                      | Δ <sub>f</sub> H°    | Δ <sub>f</sub> G°    |                      |
|                                                |                                  | gm                 | J.mol <sup>-1</sup> .K <sup>-1</sup> | cm <sup>3</sup> | kJ.mol <sup>-1</sup> | kJ.mol <sup>-1</sup> |                      | kJ.mol <sup>-1</sup> | kJ.mol <sup>-1</sup> |                      |
| Bunsenite                                      | NiO                              | 74.69              | -                                    | -               | -239.3               | -211.1               | 37.0                 | -236.8               | -190.9               | 19.2                 |
| heazlewoodite                                  | Ni <sub>3</sub> S <sub>2</sub>   | 240.20             | -                                    | -               | -344.9               | -289.9               | 50.8                 | -343                 | -253.1               | 26.4                 |
| Siderite                                       | FeCO <sub>3</sub>                | 115.86             | 95.5                                 | 29.38           | -755.9               | -682.8               | 119.6                | -754                 | -633.8               | 66.2                 |
| Hematite                                       | Fe <sub>2</sub> O <sub>3</sub>   | 159.69             | 87.4                                 | 30.27           | -826.2               | -744.4               | 130.4                | -822.3               | -689.9               | 72.1                 |
| Trevorite                                      | NiFe <sub>2</sub> O <sub>4</sub> | 232.38             | 140.9                                | 43.65           | -1070.5              | -965.1               | 169.1                | -1066.4              | -894.8               | 93.5                 |
| Magnetite                                      | Fe <sub>3</sub> O <sub>4</sub>   | 231.53             | 146.1                                | 44.52           | -1115.7              | -1012.7              | 177.4                | -1109.2              | -944.5               | 98.7                 |
| Magnesite                                      | MgCO <sub>3</sub>                | 84.31              | 65.1                                 | 28.02           | -1113.3              | -1029.5              | 180.4                | -1111.9              | -973                 | 101.7                |
| Calcite                                        | CaCO <sub>3</sub>                | 110.87             | 91.7                                 | 36.93           | -1207.4              | -1128.5              | 197.7                | -1204.9              | -1075.6              | 112.4                |
| Spinel                                         | Ni <sub>2</sub> SiO <sub>4</sub> | 209.46             | 124.1                                | 39.81           | -1389.7              | -1280.9              | 224.4                | -1389.1              | -1207.3              | 126.1                |
| Chromite                                       | FeCr <sub>2</sub> O <sub>4</sub> | 223.83             | 146                                  | 44.01           | -1445.5              | -1344.5              | 235.5                | -1443.4              | -4576.6              | 133.4                |
| Spinel                                         | MgAl <sub>2</sub> O <sub>4</sub> | 142.26             | 88.7                                 | 39.71           | -2299.1              | -2176.6              | 381.3                | -2299.8              | -2093.3              | 218.7                |

## References

Martell, A.E. and Smith, R.M., 1974. *Critical stability constants* (Vol. 1, p. 135). New York: Plenum press.

Robie, R.A. and Hemingway, B.S., 1995. *Thermodynamic properties of minerals and related substances at 298.15 K and 1 bar (105 Pascals) pressure and at higher temperatures* (Vol. 2131). US Government Printing Office.

Wang, F. and Dreisinger, D., 2022. Carbon mineralization with concurrent critical metal recovery from olivine. *Proceedings of the National Academy of Sciences*, 119(32), p.e2203937119.
